# Supplementary material for: The protective effects of HIF-1α activation on sepsis induced intestinal mucosal barrier injury in rats model of sepsis
Source: PubMed Central journal article supplement (PMC9109928; doi:10.1371/journal.pone.0268445), 2022-05-16

Supporting information contenets:

|                                              |    |
|----------------------------------------------|----|
| Inflammation cytokines-----                  | 2  |
| Oxidative stress parameter-----              | 3  |
| Intestinal permeability markers-----         | 4  |
| The H1H-1a and TJS expression-----           | 5  |
| The images of the intestinal morphology----- | 6  |
| WB bands of GAPDH-----                       | 7  |
| WB bands of HIF-1a-----                      | 8  |
| WB bands of ZO-1-----                        | 9  |
| WB bands of Occudin-----                     | 10 |
| WB bands of Claudin-----                     | 11 |

| TNF-a | pg/mL    | pg/mL    | pg/mL    | pg/mL       |
|-------|----------|----------|----------|-------------|
|       | Sham     | Sepsis   | DMOG     | Bay 87-2243 |
| 1     | 43.7598  | 369.0948 | 178.986  | 386.9714    |
| 2     | 106.5636 | 309.6858 | 176.7228 | 483.2848    |
| 3     | 80.5368  | 339.1074 | 147.867  | 387.9858    |
| 4     | 72.6156  | 388.332  | 235.0002 | 425.209     |
| 5     | 19.4304  | 292.7118 | 211.8024 | 428.8938    |
| 6     | 11.5092  | 304.5936 | 89.5896  |             |

| IL-6 | pg/mL    | pg/mL     | pg/mL     | pg/mL       |
|------|----------|-----------|-----------|-------------|
|      | Sham     | Sepsis    | DMOG      | Bay 87-2243 |
| 1    | 44.31084 | 141.11128 | 126.05858 | 212.43792   |
| 2    | 74.41624 | 242.08016 | 117.49012 | 238.60646   |
| 3    | 57.27932 | 188.81676 | 98.0374   | 276.58558   |
| 4    | 39.21608 | 171.67984 | 132.54282 | 244.65906   |
| 5    | 36.43712 | 212.20634 | 113.78484 | 293.20674   |
| 6    | 21.15284 | 170.9851  | 130.69018 |             |

| IL-1 $\beta$ | pg/mL    | pg/mL    | pg/mL    | pg/mL       |
|--------------|----------|----------|----------|-------------|
|              | Sham     | Sepsis   | DMOG     | Bay 87-2243 |
| 1            | 15.05758 | 69.27712 | 46.1374  | 95.13916    |
| 2            | 14.60386 | 94.23172 | 24.5857  | 115.78342   |
| 3            | 21.40966 | 88.33336 | 46.81798 | 115.5983    |
| 4            | 20.72908 | 89.46766 | 60.8833  | 102.90322   |
| 5            | 17.7799  | 90.60196 | 48.17914 | 147.26614   |
| 6            | 12.33526 | 60.42958 | 42.28078 |             |

| <b>CAT</b> | uM          | uM            | uM          | uM                 |
|------------|-------------|---------------|-------------|--------------------|
|            | <b>Sham</b> | <b>Sepsis</b> | <b>DMOG</b> | <b>BAY 87-2243</b> |
| 1          | 69.18725    | 17.96575      | 37.84275    | 4.44025            |
| 2          | 53.515      | 32.8735       | 47.01675    | 13.761             |
| 3          | 55.044      | 29.051        | 53.515      | 20.2285            |
| 4          | 47.399      | 18.73025      | 27.522      | 14.90775           |
| 5          | 56.573      | 29.8155       | 35.9315     | 3.67575            |
| 6          | 55.8085     | 35.167        | 37.07825    |                    |

| <b>MDA</b> | U/mL        | U/mL          | U/mL        | U/mL               |
|------------|-------------|---------------|-------------|--------------------|
|            | <b>Sham</b> | <b>Sepsis</b> | <b>DMOG</b> | <b>BAY 87-2243</b> |
| 1          | 2.36503     | 5.94634       | 3.99922     | 9.04894            |
| 2          | 2.19118     | 5.49433       | 3.16474     | 6.98082            |
| 3          | 2.49252     | 4.81052       | 2.35344     | 5.68065            |
| 4          | 2.49252     | 4.93801       | 3.33859     | 6.49036            |
| 5          | 2.23754     | 3.88332       | 3.83696     | 6.56387            |
| 6          | 1.88984     | 5.63341       | 4.42805     |                    |

| <b>SOD</b> | U/mL        | U/mL          | U/mL        | U/mL               |
|------------|-------------|---------------|-------------|--------------------|
|            | <b>Sham</b> | <b>Sepsis</b> | <b>DMOG</b> | <b>Bay 87-2243</b> |
| 1          | 90.2637424  | 63.338241     | 62.6780262  | 38.9102922         |
| 2          | 96.6565049  | 55.5126822    | 63.2362369  | 38.1766677         |
| 3          | 78.7295543  | 53.513374     | 75.5527519  | 24.9495233         |
| 4          | 74.5240858  | 51.1977489    | 73.4508135  | 23.8401359         |
| 5          | 71.4668861  | 45.6229376    | 72.7442092  | 32.0266618         |
| 6          | 74.0450775  | 55.7388828    | 68.8140436  |                    |

| <b>DAO</b> | ng/mL       | ng/mL         | ng/mL      | ng/mL             |
|------------|-------------|---------------|------------|-------------------|
|            | <b>sham</b> | <b>sepsis</b> | <b>DEX</b> | <b>Bay87-2243</b> |
| 1          | 5.79        | 185.88        | 48.37      | 161.56            |
| 2          | 15.4        | 142.33        | 58.57      | 123.12            |
| 3          | 18.22       | 165.13        | 66.05      | 129.06            |
| 4          | 28.91       | 190.37        | 84.61      | 169.89            |
| 5          | 14.71       | 192.04        | 108.91     | 156.68            |
| 6          | 7.59        | 126.48        | 100.74     |                   |

| <b>D-lactic</b> | ng/mL       | ng/mL         | ng/mL       | ng/mL              |
|-----------------|-------------|---------------|-------------|--------------------|
|                 | <b>Sham</b> | <b>Sepsis</b> | <b>DMOG</b> | <b>BAY 87-2243</b> |
| 1               | 41.9226134  | 48.8095424    | 44.224723   | 88.1440496         |
| 2               | 40.0731658  | 83.1019222    | 52.3597058  | 104.80294          |
| 3               | 24.1588632  | 88.5726658    | 63.8249876  | 85.6950288         |
| 4               | 36.3548708  | 81.213675     | 74.0874818  | 98.0397682         |
| 5               | 34.9968848  | 75.2126702    | 47.490356   | 90.0747376         |
| 6               | 37.6805238  | 83.2765204    | 51.6160468  |                    |

| <b>FABP2</b> | ng/mL       | ng/mL         | ng/mL       | ng/mL              |
|--------------|-------------|---------------|-------------|--------------------|
|              | <b>Sham</b> | <b>Sepsis</b> | <b>DMOG</b> | <b>BAY 87-2243</b> |
| 1            | 1.1899076   | 5.8100091     | 3.99075845  | 8.67976885         |
| 2            | 2.54989     | 5.95670075    | 4.31430265  | 9.5006065          |
| 3            | 2.6521338   | 7.55522845    | 3.84933455  | 7.9833792          |
| 4            | 2.65660805  | 6.40637235    | 4.4198658   | 11.8415543         |
| 5            | 2.0865089   | 5.5906571     | 4.4226077   | 11.8087882         |
| 6            | 1.55205445  | 5.95316535    | 2.8624666   |                    |

| <b>FD-4</b> |             |               |             |                    |
|-------------|-------------|---------------|-------------|--------------------|
|             | <b>Sham</b> | <b>Sepsis</b> | <b>DMOG</b> | <b>BAY 87-2243</b> |
| 1           | 12          | 30            | 20          | 32                 |
| 2           | 13          | 26            | 22          | 38                 |
| 3           | 7           | 24            | 16          | 32                 |
| 4           | 6           | 27            | 20          | 29                 |
| 5           | 9           | 22            | 16          | 30                 |
| 6           | 8           | 21            | 16          |                    |

HIF-1 $\alpha$ 

|  | Sham | Sepsis      | Sepsi +DMOG | sepsis+BAY87-224 |
|--|------|-------------|-------------|------------------|
|  | 1    | 1.706598553 | 2.998809668 | 0.541552707      |
|  | 1    | 1.582368265 | 2.193431332 | 0.370099115      |
|  | 1    | 1.772611195 | 3.106369279 | 0.257796764      |

## ZO-1

|  | Sham | Sepsis      | Sepsi +DMOG | sepsis+BAY87-224 |
|--|------|-------------|-------------|------------------|
|  | 1    | 0.56127624  | 0.948457587 | 0.399666203      |
|  | 1    | 0.633064773 | 0.790593945 | 0.415709586      |
|  | 1    | 0.708412973 | 0.895495097 | 0.116622442      |

## Occudin

|  | Sham | Sepsis      | Sepsi +DMOG | sepsis+BAY87-224 |
|--|------|-------------|-------------|------------------|
|  | 1    | 0.582520036 | 0.724782619 | 0.459463804      |
|  | 1    | 0.574109924 | 0.673385675 | 0.390193281      |
|  | 1    | 0.65762827  | 0.868248905 | 0.360874064      |

## Occudin

|  | Sham | Sepsis      | Sepsi +DMOG | sepsis+BAY87-224 |
|--|------|-------------|-------------|------------------|
|  | 1    | 0.577419357 | 1.002160068 | 0.172717716      |
|  | 1    | 0.631436918 | 0.839658559 | 0.443790324      |
|  | 1    | 0.670009868 | 0.769134006 | 0.363809586      |

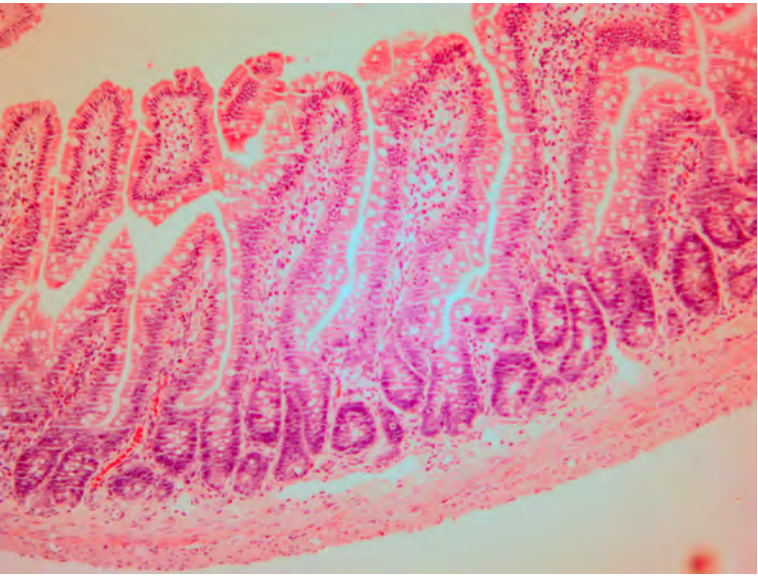

Sham 1

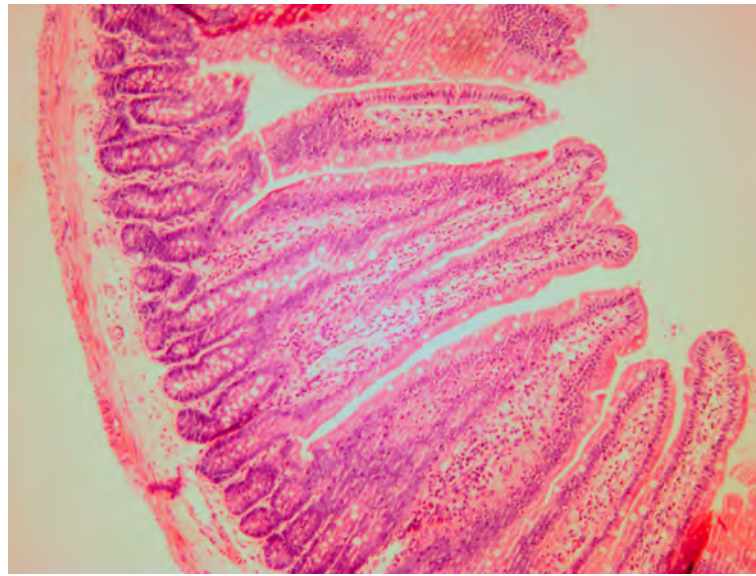

Sham 1

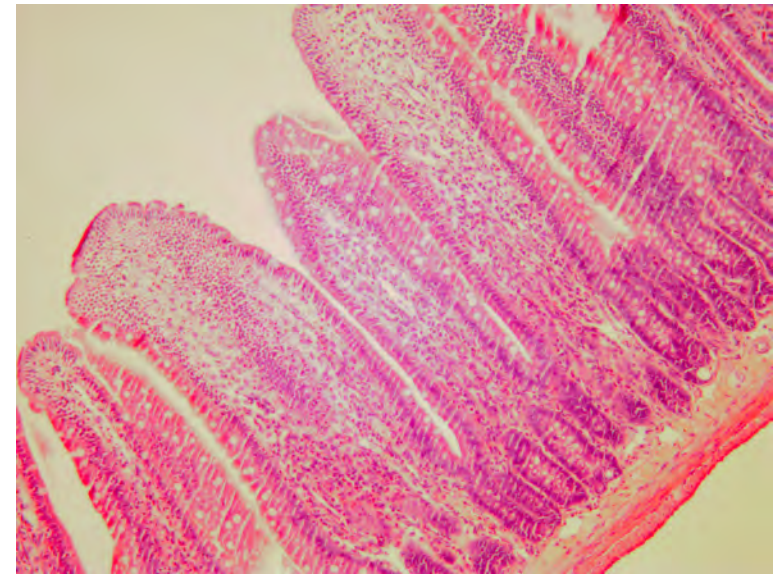

Sham 3

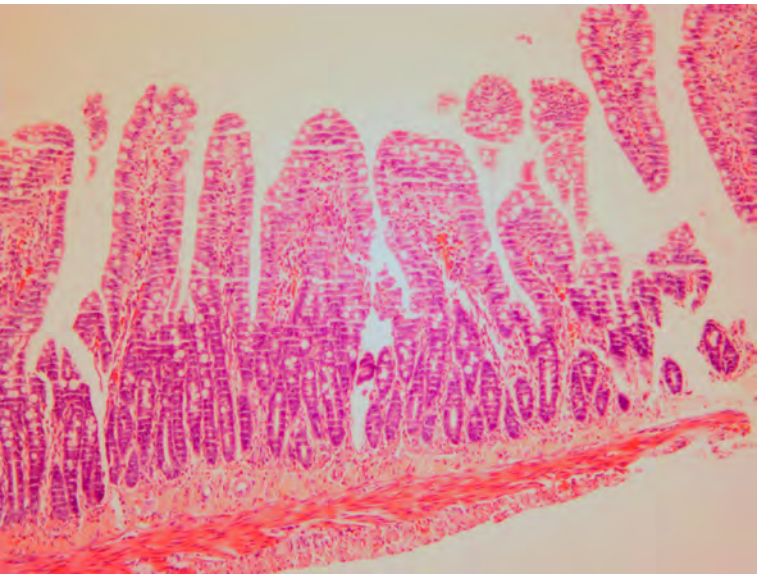

Sepsis 1

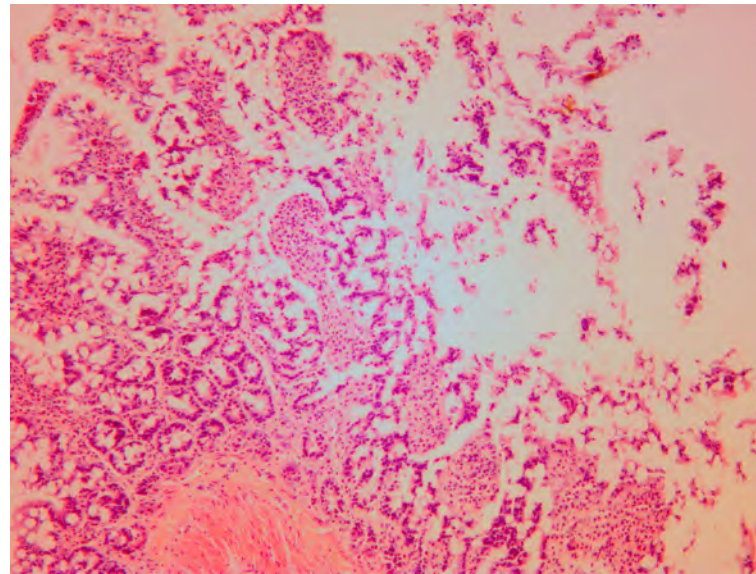

Sepsis 2

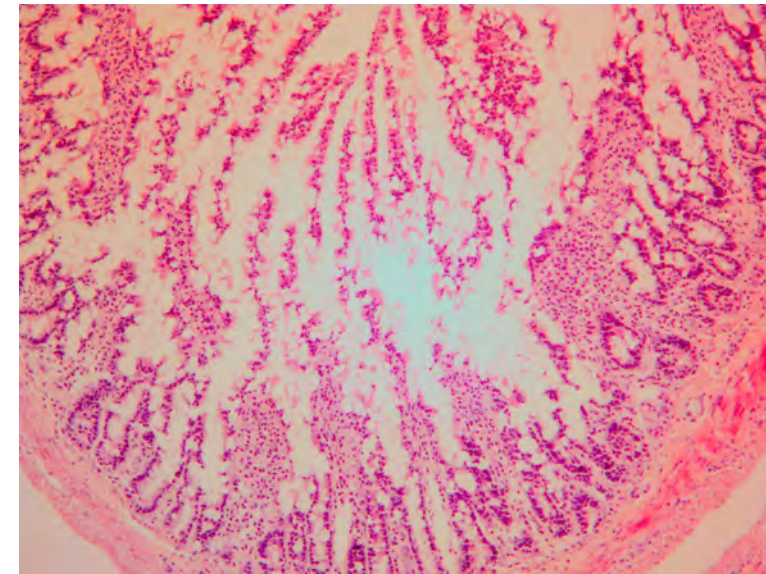

Sepsis 3

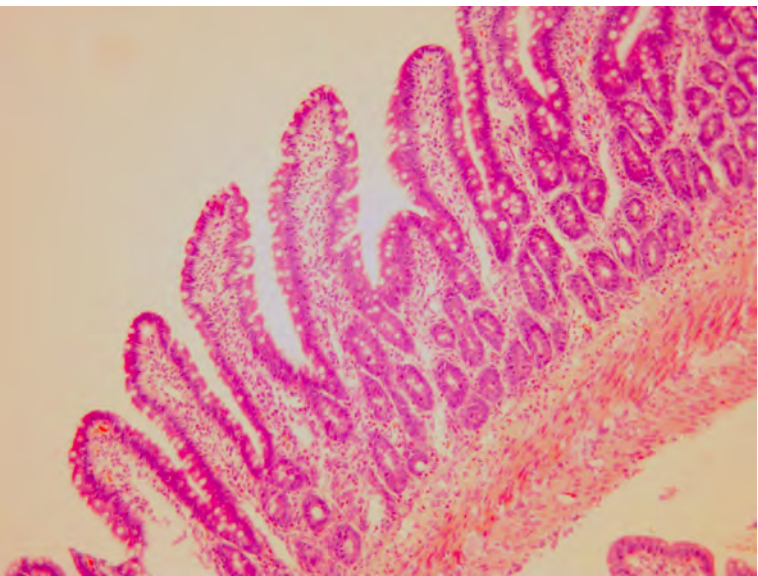

Sepsis + DMOG1

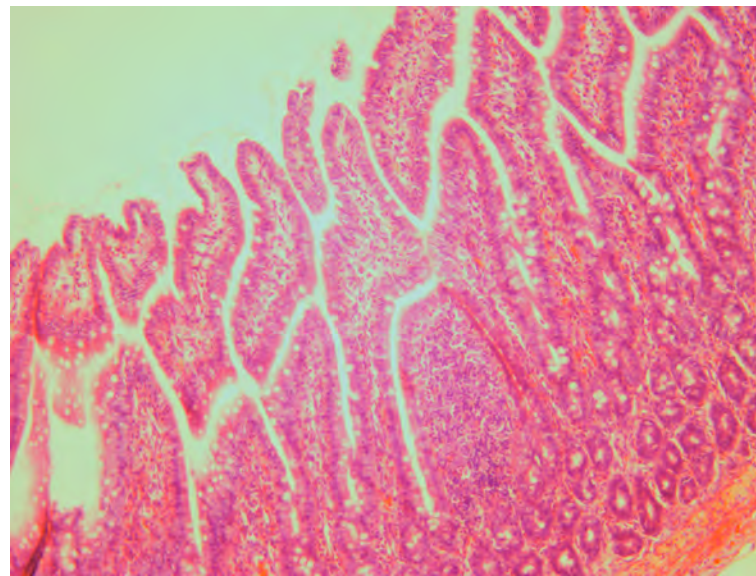

Sepsis + DMOG2

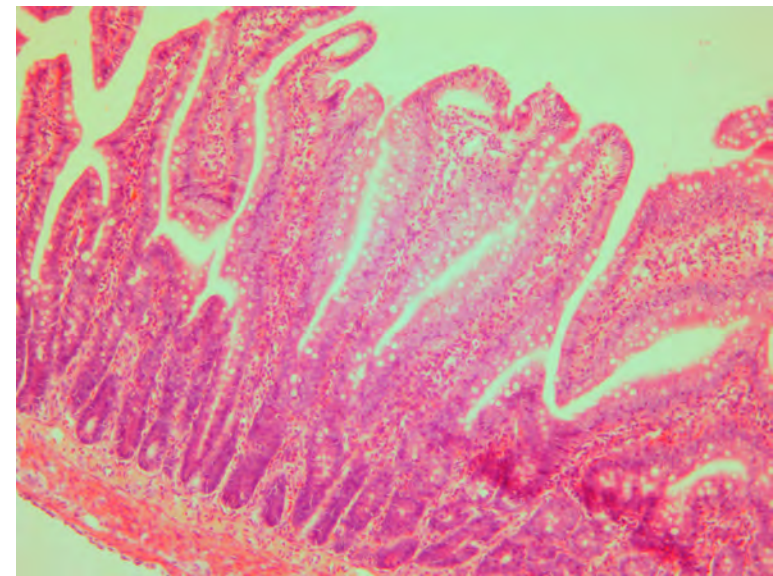

Sepsis + DMOG3

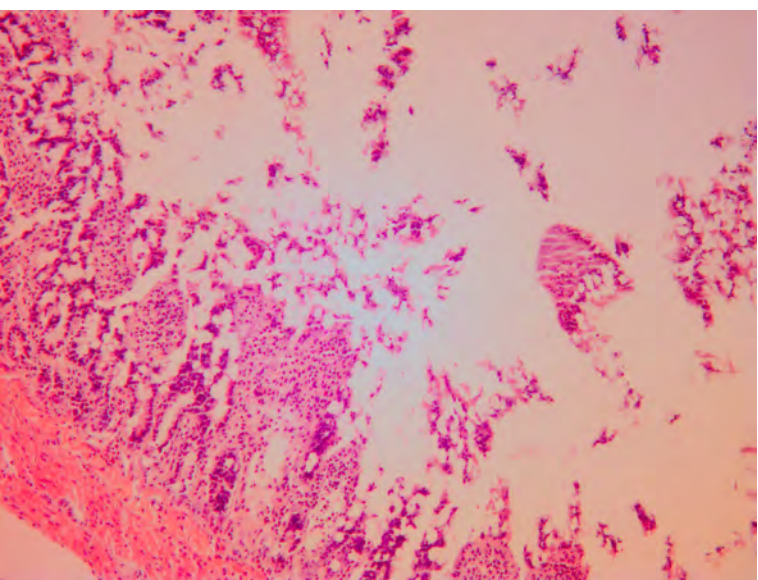

Sepsis + MAY 87-2243

## 1: GAPDH

Special note: it should be explained that the internal reference protein and the target protein come from the same film, but they are exposed separately.

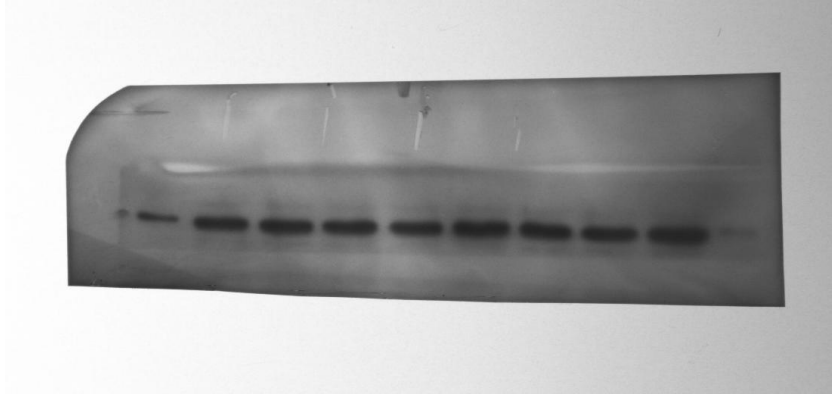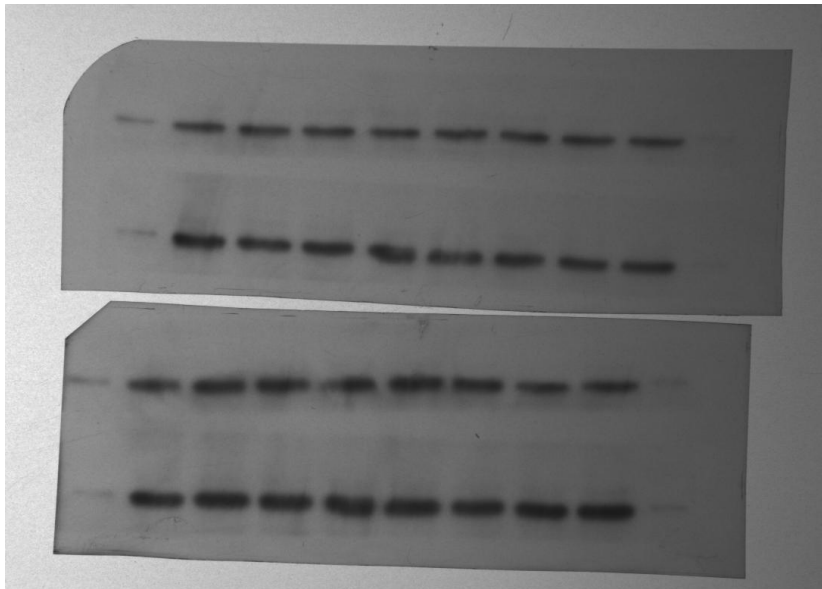

## 2: HIF-1 $\alpha$

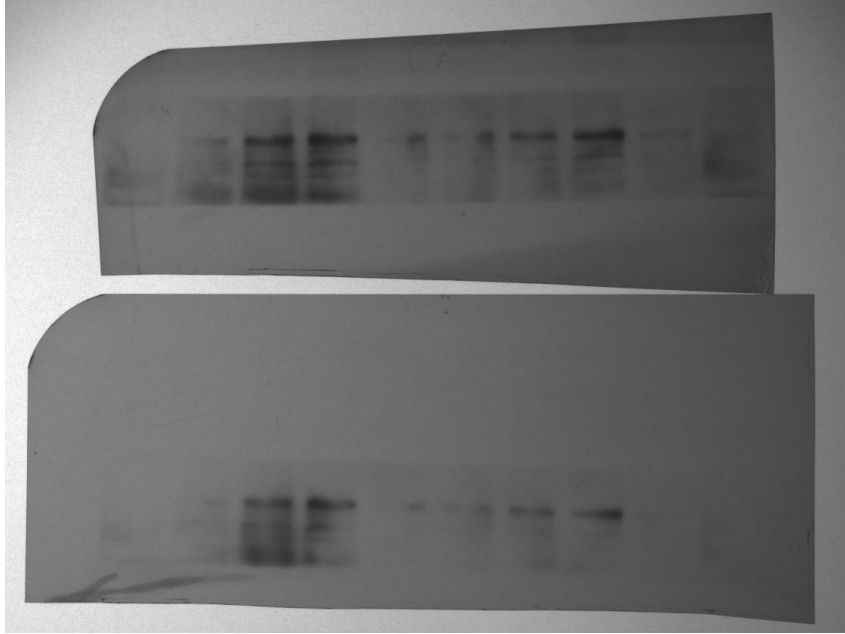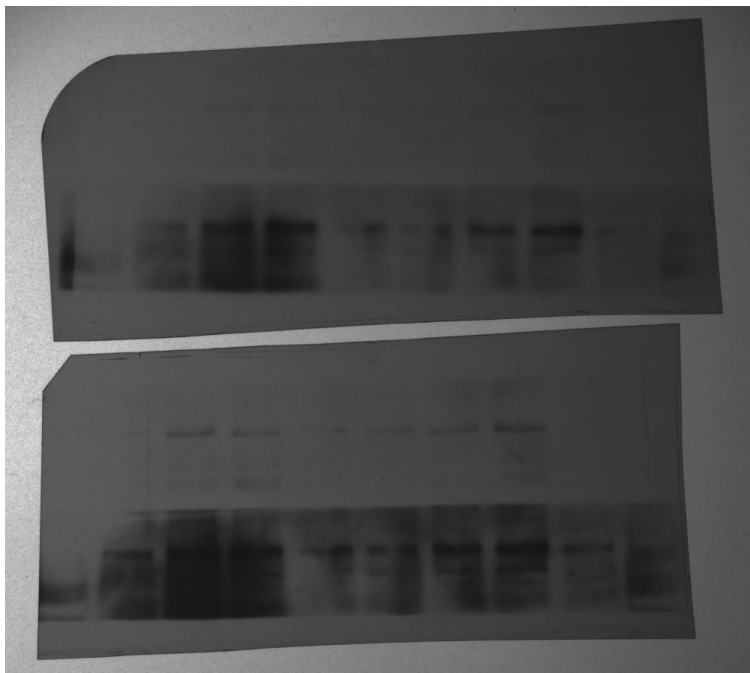



**3: ZO-1**

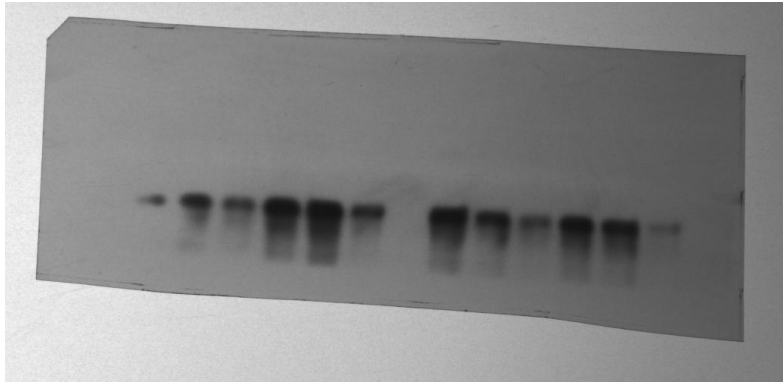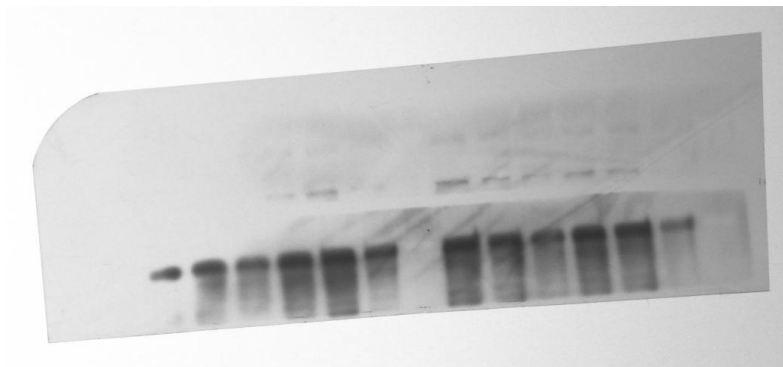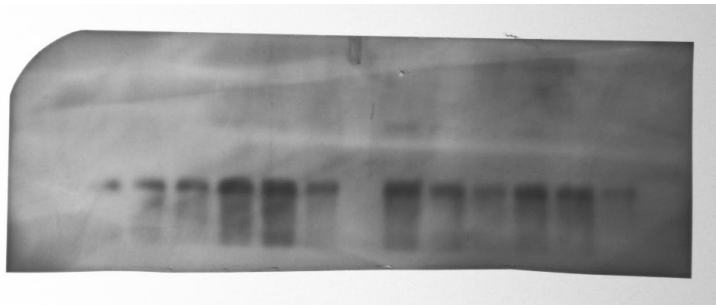

#### 4: Occudin

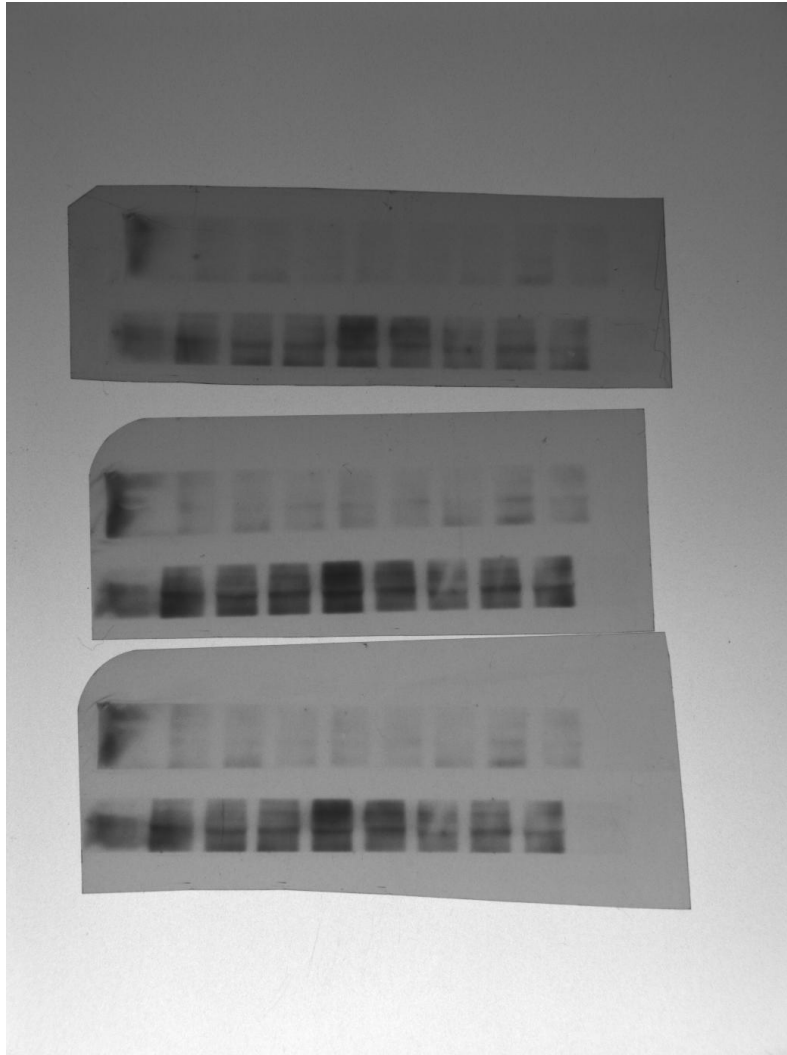

## 5: Claudin

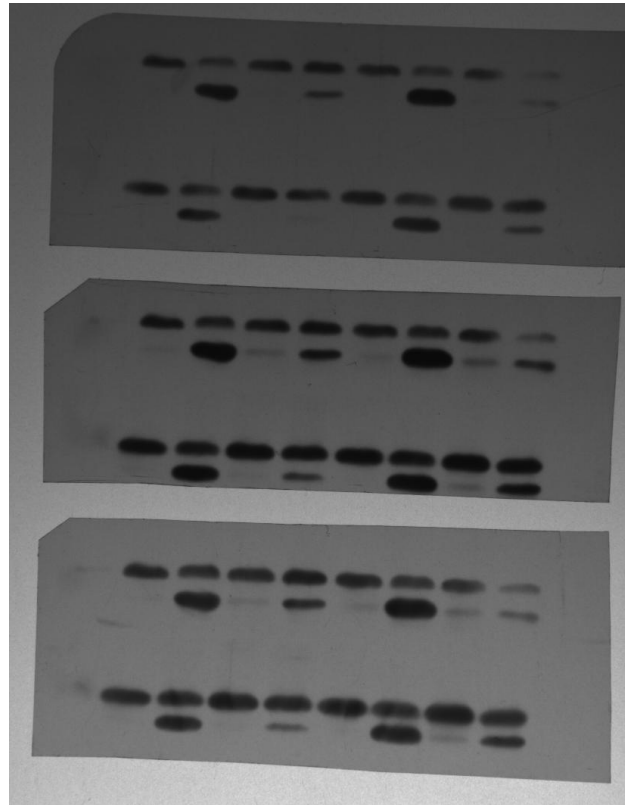

Supplement: pone.0268445.s002.pdf [file pone.0268445.s002.pdf]
